# Supplementary material for: Rice apoplastic CBM1-interacting protein counters blast pathogen invasion by binding conserved carbohydrate binding module 1 motif of fungal proteins
Source: PubMed Central journal article supplement (PMC9521807; doi:10.1371/journal.ppat.1010792), 2022-09-29
Supplement: ppat.1010792.s005.pdf [file ppat.1010792.s005.pdf]

S5 Table. A list of amino acid sequences of DUF26 used for constructing phylogenetic tree

Single DUF26 sequences

|             |                                                                                                         |
|-------------|---------------------------------------------------------------------------------------------------------|
| AT3G04370.1 | NYSNQNLFRAQALSSFLRKESESSRSKFLKTLVGNKHAVSGWFQCREDPSEICHKCVGDLREISSRSC<br>GNATSARIHLRGCHLIYK              |
| AT3G22030.1 | GNVNSFNKKTTEFLYKLGKADRLDVDGINFLYYAAGEMRLGKQTLFAMVQCAKDILSCKDCLEWSIKELS<br>KCCDGKQGARVVGITICNLRYELY      |
| AT4G20530.1 | KCSNTQGKYKQGSFAFEKLNLLVLTITSIGNFRDGFRTYEEGEDPNNVFMVQCRGDSYWSKCPPCISTA<br>VSLRRRCPRNKGAIWYDQCLLKIS       |
| AT4G20540.1 | KCSNTQGKYKQGSFAFEKLNLLVLTITSIGNFRDGFRTYEEGEDPNNVFMVQCRGDSYWSKCPPCISTA<br>VSLRRRCPRNKGAIWYDQCLLKIS       |
| AT4G20600.1 | NNMSDRGLFNKETSALLEKLAYKASDRNLDGKQLVLYAAGEKRIGTKKVYAMVQCTKDIFTKCFECLE<br>GILRKFPQCCDGKRGGRVFGTSCNFR      |
| AT4G20630.1 | KCSNTQGKYKQGSFAFEKLNLLVLTITSIGNFRDGFRTYEEGEDPNNVFMVQCRGDSYWSKCPPCISTA<br>VSLRRRCPRNKGAIWYDQCLLKIS       |
| AT4G20650.1 | KCSNTQGKYKQGSFAFEKLNLLVLTITSIGNFRDGFRTYEEGEDPNNVFMVQCRGDSYWSKCPPCISTA<br>VSLRRRCPRNKGAIWYDQCLLKIS       |
| AT5G41280.1 | CNDSSGNFTRNTTYNTNLNTLLSTLSNQSSFANYNLTGLGSDTVHGMFLCIGDVRNRTTCNACVKNATI<br>EIAKNCTNHREAIYYFSCMVRYS        |
| EFJ04200    | NVNSAMVVLSSHGSSTTVTSGDGKSRVFLRECRDMSAEQCNTCMAVATKNLHRETICARFDTFL                                        |
| EFJ10327    | SFSPGSAFERNLDAALQSVISSRSPPSAALGASPDVAYARGECYNNLSPQDCVLCGLMANQTIRGQAPR<br>TIGARLFSNSSDYSCYLRNY           |
| EFJ12758    | NTSLGSPFQQNWLVDVYQVLLDHAPQAVSSEFSHGQSPNTVSGFALCIKGSNCKGCLQTIKANLDRAAPL<br>SKGARLCMKTSTDVCYMRYEAY        |
| EFJ12964    | ESSEDSPEKKNLASAYESLLSPSQESPRQAQAGDDPDTVYGYAACFEGNCECLATCKNYFTQVAPHAV<br>GARLCLKSGSDACYLRNY              |
| EFJ13641    | RTYARGSVYGSNLNLLFDRLITTTGYDHSVGSNRVYGFSECYGSPNCRSCLLAAVNSIRSAPRAIGARIC<br>KALCYLRNY                     |
| EFJ13924    | NTSLGSPFQQNWLVDVYQVLLDHAPQAVSSEFSHGQSPNTVSGFALCIKGSNCKGCLQTIKANLDRAAPL<br>SKGARLCMKTSTDVCYMRYEAY        |
| EFJ15639    | STPYATNQNRLLDILKDTGSDSFIYTSVGDAPYIAYGRAECYGNCGNCLVEARNTIKNAVPPQAVGARLCT<br>DDCYLRFENY                   |
| EFJ15855    | NTTEGSPFQKNVETVLNFFYEHNPPNGFATCLGYGDFPNTVYGHGTGCYNMSDQPSCEICKAYQGIQ<br>QNAPYTLGGTYWINETEIRCLRYENY       |
| EFJ16456    | NVNSAMVVLSSHGSSTTVTSGDGKSRVFLRECRDMSAEQCNTCMAVATKNLHRETICARFDTFL                                        |
| EFJ18708    | KTTEGSPFQKNVETVLKFFYEHNPPNGFATCLGYGDFPNTVYGHGTGCYNMSDQPSCEICKRAYQGIQQ<br>YALYALGGTYWINETESRCLRYENY      |
| EFJ22561    | ESSEDSPEKKNLASAYESLLSPSQESPRQAQVGDGDDPDTVYGYATCFEGNCECLATCKNYFTQVAPHAVG<br>ARLCLKSGSDACYLRNY            |
| EFJ22969    | CSDESIPTGSTYWTSLNQLTLDLIQNTAYANNMTYSVKNGGDDVSAYGQAQCFNMVGNPVMCKSCVE<br>DLVRRRAWRECGDAIAGMLMLKDKTIRYQD   |
| EFJ28936    | RTYARGSVYGSNLNLLFDRLITTTGYDHSVGSNRVYGFSECYGSSNCRSCLLAAVNSIRSAPRAIGARIC<br>KALCYLRNY                     |
| EFJ30128    | RKTTQGSQFQKNVETVIQFLYEHNPPNGFASCLGYGDFPDTAYGHGTGCYNMSDQTSASCISQIQQTYSEFQ<br>QLAPLAVGGVLTWNTDSNRCRIRFENY |
| EFJ30567    | CSDESIPTGSTYWTSLNQLTLDLIQNTAYANNMTYSVKNGGDDVSAYGQAQCFNMVGNPVMCKSCVE<br>DLVRRRAWRECGDAIAAMLMLKDKTIRYQD   |
| EFJ32980    | NTTEGSPFQKNVETVLNFFYEHNPPNGFATCLGYGYFPNTVYGHGTGCYNMSDQPSCEICKAYQGIQQ<br>NAPYTLGGTYWINETEIRCLRYENY       |
| EFJ33692    | RNTQPGSAFQRNLSNVYRRIINGATFRQGSISYNAGVDPDRVYGFSAFCGGFTAPGDVCVQLVDIRANF<br>DSVAPLAVGARMCSRNGERTCYLRNY     |

|                  |                                                                                                          |
|------------------|----------------------------------------------------------------------------------------------------------|
| EFJ33923         | LYSFGDPFGKNLGLVLDLDDLLGTTGRDFKDYTAISPRPSRFVYGHAKCRHALSAGECGVCLKGVAAALAD<br>QCGNAVGGGRAMFVDCFMRYEAY       |
| EFJ37042         | RNTQPGSAFQRNLSNVYRRIINGATFRQGSISYNAGVDPDRVYGFSAFCGGFTAPGDCVQLVDIRANF<br>DSVAPLAVGARMCSKNGERTCYMRYENY     |
| EFJ37434         | LYSFGDPFGKNLGLVLDLDDLLGTTPRRDFKDYTAISPRPFRFVYGHAKCRHALSAGECGVCLKGVAAALAD<br>QCGNAVGGGRAMFVDCFMRYEAY      |
| Gnk2             | CNTQKIPSGSPFNRLRAMLADLKQNTAFSGYDYKTSRAGSGGAPTAYGRATCKQISQSDCTACLSNL<br>VNRIFSICNNAIGARVQLVDCFIQYEQ       |
| LOC_Os01g36500.1 | CGASNYTADSMYRLNLDGMSASLFPAGAGGGGGIFVRGSSGADPDKVYVAVALCRGDVDDAPACSSCF<br>DAAFRRAMQLCPRSKDATIYYDECLLRFS    |
| LOC_Os01g38910.1 | CSLSGGRYGQNTTYEDNLKALAARLVGVARVSNFASHTVGSAPDAAYGIALCRGDYTGDECANGLRKA<br>ENAVENRFLCDRFRDATIYYDQYMLRFS     |
| LOC_Os01g56720.1 | GRVVAQCAAGVAPADCVQCLEGAAREMPRCFREARREEQEGEVGIVVSDDCVLRFD                                                 |
| LOC_Os01g56840.1 | TGSNGTAFRANLLTLLASLPDQAAPTGFASMQAGAGGRAPGGDDDDRAFARGSLGDSTPSQCRDCL<br>AAAVIDVAEGCGADTRRAGAWLSGCYLAYAD    |
| LOC_Os03g19840.1 | NGKTRRRSINSVSDLVAKAASNGGFATSSAGKGNVYGLAQCRGDVSASDCKACLVEAANYTSLFCH<br>YASDSRMWYDYCFMRYKN                 |
| LOC_Os07g35190.1 | YAANSTYEANLRYLAATLPKVMNGSSSSSDVLAGERPNIASASCNSSSSEYHDCGACVAEAFRCAR<br>RLCPYSRHAVVHLGGGACSVRY             |
| LOC_Os10g10540.1 | CTSTAAGNYTQDGAYAANLGRLLAMLPNETVSKNGGFFNGTVGNGTATVYGLAMCAADFSRADCMD<br>CLVAAGISAGGVVKRCPGSTTVSAMFDQCLLRYS |
| LOC_Os12g41510.1 | CSTTGNYTVGNQFEKNLDQLLSTLATAATDDGWFTSSVGTGTAYQVFLIMCHADYNATECKKLAG<br>APAGIKQVCPGSRVTKANYDACLLRYS         |
| PTQ30062         | RNGTAYQHNVRVSLKLMKAVQSRPLFDVWDEASDAYDNSETAYGVAGCNTVTPPECRYCLQYIVTNL<br>QQWCPKDPKSAKIVLKDCYLHYDRY         |
| PTQ32071         | AVSACIDSLTEEPMDKKTASAIEVTPDKVVYCSMDCKQNLTLQEQACLQAKLLRENYCPRAVSASSVI<br>GICSLMHET                        |

## DUF26-A sequences

|             |                                                                                                     |
|-------------|-----------------------------------------------------------------------------------------------------|
| AFP1        | CSGSSYAGSSKAVANINSLADLVASASSTGGYATSTAGKGNNSIYGLAQCRGDVSASDCASCLADA<br>QLPSTCSYSSDARIWYDYCFMRYEN     |
| AT1G04520.1 | QQFSDPSGLYSQALSAMFGSLVQSTKTRFYKTTTGTSTTTITGLFQCRGDLSNHDCYNCVSRPLVSDKL<br>CGKTIASRVQLSGCYLLE         |
| AT1G19090.1 | SSITDVSPPIYVFLQCRELDVSDCRHCFNESRLELERKCSGSGGRIHSDRCFLRFD                                            |
| AT1G61750.1 | CYTSNGYTPNSSYKSNLDTLISVLDSQSSNKGFYASGSSPTTIVYGSYLRCRDISSTCETCISRASKNVFI<br>WCPVQKEAIIWYEECFRYS      |
| AT1G63550.1 | CNPTNFTQTSSYETNRDTLASLRESSSLGHYSNATEGLSPDTVHGMFLCRGDITASCVDCVQTATTEI<br>ASNCTLNKRAVIYYDECMVRYSN     |
| AT1G63570.1 | CSVDSFTQTSSYETNRNILLTTLSSLVHYLNATIGLSPDTVYGMFLCRGDINTTSCSDCVQTAIEIATN<br>CTLNKRAFIYYDECMVRYSN       |
| AT1G63580.1 | PDTYQSNRNTVLSTLRNHSSLSGYSYFNATAGLSPNTVYGMFLCIGNISKTSNCVHSATLEMDKSCESH<br>DTSFMFSDECMVRYSD           |
| AT1G63590.1 | CTQFDNVTRTSSYLSNRDVLSTLRNRSSIGSYSNATAGLSPNTIYGMFLCRGDLNRTSCSDCVNATTLEIY<br>KSCFYRKSALVISNECIVRYSN   |
| AT1G63600.1 | CNQFSDNFTQTSTYETNRETVLSSLRLRSSLGYSYFNATAGLSPNTVYGMFLCRGDISETSCSDCVQTATTEI<br>SRNCTYQKEAFIFYEEMVRYSD |
| AT1G70520.1 | ETAYVPNFVATMEKISTQVQTSFGVVALTGTGPDANYGLAQCYGDLPLNDCVLCYAEARTMLPQCYPQ<br>NGGRIFLDGCFMRAENY           |

|             |                                                                                                         |
|-------------|---------------------------------------------------------------------------------------------------------|
| AT1G70530.1 | CNNRRTTPQQRSLFVTNFLAAMDVAVSPLVEAKGYQVVTNGTGNLTVYAYGECIKDLDKDCDLCAFIK<br>AKVPRCLPFQKGRGGQVFSQDGCYIRYDDY  |
| AT1G70690.1 | CSPAKFSPSSGYETNLNLSLSSFTSTAQTRYANFTVPTGKPEPTVTVYGIYQCRGDLPTACSTCVSSAVA<br>QVGALCSNSYSGLQMENCLIRYDN      |
| AT2G01660.1 | CSQEKYFPGSPYESNVNLSLTSFVSSASLYTYNNFTTNGISGDSVVYGLYQCRGDLSSGSDCARCVARA<br>VSRLGSLCAMAASGGALQLEGCFVKYDN   |
| AT2G31620.1 | CINSEGKYKAKNSYESRLKDLHLSMSNILDYGFHGVGGADSSTYYIKAQCRGDASESKRCLFTAFSGIL<br>RRCNNRGRRIIWDNCFLYIS           |
| AT2G33330.1 | PSGLYSQALSAMYGLLVQSTKTRFYKTTTGTSQTSVTGLFQCRGDLNNDNCYNCVSRPVLVSGKLCGK<br>TIAARVQLSGCYLLE                 |
| AT3G21960.1 | CINGEGTFKSGSPYEKEIKLIDFLSSFIKDYSFVHGVSGIGPDDINVKFQCRGDTLQAKRCLATAFSEIR<br>SKCPNNKGRRIIWDNCHLDL          |
| AT3G21970.1 | CNNTQGRYTHGSTFEKNLNQVLHNISNLDLRYGYAYVSNVVAYKVKDPNIVFVLLQCRGDSFGSKCHS<br>CLSTAVSGLRERCPGNRGATIWDQCLEIS   |
| AT3G21980.1 | KCNNTGKYSHGSAFEKYINLALRAIDSDNYLNGFAYIERGEDPNKVFVMYQCRGDSYSGKCKSCISAAS                                   |
| AT3G21990.1 | KCSNTQGKYKQGSFAEKNLNLVSTITSIGNFRDGFYTEEEDPNNVFMFQCRGDSYWSKPPCISTA<br>VSLRRRCPRNKGAIIWYDQCLLKIS          |
| AT3G22040.1 | CRVGQKGYHPGSRYEKDFDSLTSFVAANKFIDGFFVHSSNSDGNSTIIFQCRGDSYKNCRTCYDTALA<br>GFRKRCPRNKGGIWDQCFLDVS          |
| AT3G22060.1 | CSDIEGSFTSKSLYESNLNLSQSLYKVPSTGFAASSTGNTPNNVNGLALCRGDASSDCRSCLETAIPEL<br>RQRCNNKAGIVWYDNCLVKYSS         |
| AT3G29040.1 | CNNTQGTYTRGSTFEKNLNQVIRNISHLHLYGYTYNSNVEAYEVSKDPNIVFVLLQCRGDSYSGKCHSCL<br>HTAFSGLRERCRGNKGAIIWYDQCVLEIS |
| AT3G45860.1 | SSILTYSRNSTYFTNLKTLSSLSRNASYSTGFQTATAGQAPDRVTGLFLCRGDVSEQVCRNCVAFSVKET<br>LYWCPYNKEVVLVYDECMLRYSH       |
| AT3G60720.1 | CSPEKYTPNTPFESNRDTFLSSVVTSSSDASFNSFAVGNDSSSSSSSSAVFLYQCRDDLRSDDCKCIQTS<br>VDQITLICPYSYGASLQLEGCFLYET    |
| AT4G00970.1 | CLSQQSNFAKSSQFSKNLDSLVSSIPSLKSNNTYNYFSLVSGSISDQERVEAIGICNRVNRVDCLNICIAQAA<br>VNLTMYCPQHRGAYVRATKCMFRYSD |
| AT4G04490.1 | EDFSPNTSYVENESLLPSLASNVIRERGFYVNSLDGVYALALCRKHVEVQACRRCVDRASRTLLTQCRGK<br>TEAYHWSENDANVSCLVRYSN         |
| AT4G04500.1 | NYGVSRTYLFSSLPNSVVSNGGFYNASFGGRDSKNNRVHVVALCRRGYEKQACKTCLEHVEDTKSKCPRQ<br>KESFSWVTDEFDDVCSLRYTN         |
| AT4G04510.1 | SFPTNSSYQKNRDSLFSTLSDKVTNGGFYNASLDGVHVVGLCRRDYDRQGCINCVEESIRQIKTSCSNRV<br>QSFHCNSDDRERVSCLVRT           |
| AT4G04540.1 | SFFNGNSSYAQNRRDLFSTLPNKVVTNGGFYNSSLGKSPNIVHAVALCGRGYEQQACIRCVDSAIQGILT<br>TTSCLNRVDSFTWDKDEEDNVSLVSTS   |
| AT4G04570.1 | FNGNSSTFAQNRQKLFPTLADKVIINDGFYNASLGQDPDKVYALVSCARGYDQACYNVQSLTQNTLT<br>DCRSRRDSFIWGGNDVTCLVRSSN         |
| AT4G05200.1 | CPNTTYSRNSSYLNLRTVLSSLSPPNAAAYASLFDNAAAGEENDSNRVYGVFLCRGDVSAEICRDCVAFA<br>ANETLQRCPREKVAVIWYDECMLVRYSNQ |
| AT4G11460.1 | CSEKFGTFTPGGTFDKNRRILSSLPSEVTAQDGFYNASIGTDPDQLYAMGMGIPGAKQKLCRDCIMDVT<br>RQLIQTCPNQTAIIHWSGGGKTVCMARYYN |
| AT4G11470.1 | VFFRPNGNYDTNRRLLVSTLASNVSSQNNRFYNVSVGEGAGRIYALGLCIPGSDPRVCSDCIQLASQGLL<br>QTCPNQTDSEFYWTGDNADKTLCFVRYSN |
| AT4G11480.1 | FFRPNGTYDTNRHLILSNLASNVSSRDGYNGSVGEGPDRIYALGLCIPGTDPKVCCDCMQIASTGILQN<br>CPNQTDSDWRSQKTLCFVRYSN         |
| AT4G11490.1 | CNETGYFEPWKTYDTNRRQLTSLASKVVDHYGFYNSIGKVPDEVHVMGMGICIDGTEPTVCSDCCLKVAA<br>DQLQENCPNQTEAYTWTPHKTLCFARYSN |

|             |                                                                                                        |
|-------------|--------------------------------------------------------------------------------------------------------|
| AT4G11521.1 | YFKPNGTYDLNRRRILSSLASKVTAHNGFYSSSTIGQPNQMFIISMCIPIGTKPERCSDCIKGSTDGLLRSCP<br>NQTVGYVWPDCCMVRYSN        |
| AT4G11530.1 | FFKPNSTYDLNRRQILSTLSSNVTSHGFFNSKFGQAPNRVINGMCIPGTPETCSDCIKGASDKISESCP<br>NKTDAYTWPDCCMVRYSN            |
| AT4G20550.1 | KCSNTQGKYKQGSFAFEKNLNLVLSTITSIGNFRDGFYRTEEGEDPNNVFVFMFQCRGDSYWSKPPCISTA<br>VSGLRRCRPRNKGAIWYDQCLLKIS   |
| AT4G20560.1 | KCSNTQGKYKQGSFAFEKNLNLVLSTITSIGNFRDGFYRTEEGEDPNNVFVFMFQCRGDSYWSKPPCISTA<br>VSGLRRCRPRNKGAIWYDQCLLKIS   |
| AT4G20570.1 | KCSNTQGKYKQGSFAFEKNLNLVLSTITSIGNFRDGFYRTEEGEDPNNVFVFMFQCRGDSYWSKPPCISTA<br>VSGLRRCRPRNKGAIWYDQCLLKIS   |
| AT4G20580.1 | KCSNTQGKYKQGSFAFEKNLNLVLSTITSIGNFRDGFYRTEEGEDPNNVFVFMFQCRGDSYWSKPPCISTA<br>VSGLRRCRPRNKGAIWYDQCLLKIS   |
| AT4G20590.1 | KCSNTQGKYKQGSFAFEKNLNLVLSTITSIGNFRDGFYRTEEGEDPNNVFVFMFQCRGDSYWSKPPCISTA<br>VSGLRRCRPRNKGAIWYDQCLLKIS   |
| AT4G20600.1 | KCSNTQGKYKQGSFAFEKNLNLVLSTITSIGNFRDGFYRTEEGEDPNNVFVFMFQCRGDSYWSKPPCISTA<br>VSGLRRCRPRNKGAIWYDQCLLKIS   |
| AT4G20610.1 | KCSNTQGKYKQGSFAFEKNLNLVLSTITSIGNFRDGFYRTEEGEDPNNVFVFMFQCRGDSYWSKPPCISTA<br>VSGLRRCRPRNKGAIWYDQCLLKIS   |
| AT4G20620.1 | KCSNTQGKYKQGSFAFEKNLNLVLSTITSIGNFRDGFYRTEEGEDPNNVFVFMFQCRGDSYWSKPPCISTA<br>VSGLRRCRPRNKGAIWYDQCLLKIS   |
| AT4G20640.1 | KCSNTQGKYKQGSFAFEKNLNLVLSTITSIGNFRDGFYRTEEGEDPNNVFVFMFQCRGDSYWSKPPCISTA<br>VSGLRRCRPRNKGAIWYDQCLLKIS   |
| AT4G20670.1 | KCSNTQGKYKQGSFAFEKNLNLVLSTITSIGNFRDGFYRTEEGEDPNNVFVFMFQCRGDSYWSKPPCISTA<br>VSGLRRCRPRNKGAIWYDQCLLKIS   |
| AT4G21230.1 | GNFTSNTSYSNLNRLISSLPDLTPTINGFYNISINGEVNAIALCRGDVKNQDCISCITTAQQLVESCPNII<br>EANIWLEKCMFRYT              |
| AT4G21400.1 | CVASGGNFTANSSFAGNLNGLVSSLSTSKPYGFYNLSSGDSSGERAYAIGLCRREVKRDDCLSCIQIAR<br>NLIEQCPLTNQAVVWYTHCMFRYSN     |
| AT4G21410.1 | CVDRGNFTANSTFAGNLNRLVSSLKQAYGFYNLSSGDSSGERAYAIGLCRREVKRDDCVSCIQTAAR<br>NLTKQCPLTKQAVVWYTHCMFRYSN       |
| AT4G23130.1 | CTNRISRNSIYFSNLQTLTSLSSNNAYFSLGSHSLTKGQNSDMVFGLYLCKGDLSPESCRECVIFAAKDTR<br>SRCPPGKEFLIQYDECMLGYSD      |
| AT4G23140.1 | CPNTTYSNSTYSTNLRTLSSLSRNASYSTGFQATAGKAPDRVTGLFLCRGDVSPEVCRNCVAFSVN<br>QTLNLCPKVREAVFYEQCILRYSH         |
| AT4G23150.1 | CPNATTYSSNSTYLTLNLKLLSSLSRNASYSTGFQATVQGALDRVTGLFLCRGDVSPEVCRNCVTFAVN<br>NTFSRCPNQREAVFYEECILRYSH      |
| AT4G23170.1 | CPNTTYSRSTYSTNLRTLSSFASRNASYSTGFQNVTVGQTPDLVTGLFLCRGDLSPEVCSNCVAFSVD<br>EALTRCPSQREAVFYEECILRYSD       |
| AT4G23180.1 | CQNTANYTSNSTYNNLKLTLASLSRNASYSTGFQATVQGAPDRVTGLFNCRGDVSTEVCRRCVSAFA<br>VNDTLTRCPNQKEATLYYDECVLRYSNQ    |
| AT4G23190.1 | CTTDKGTFRPNGTYDVNRRILSSLPNVTDQDGLYNGSIGQQPNRVYAIGMCIPGSTSEDCSDCIKES<br>EFFLKNCPNQTEAYSWPGEPTLCYVRYSN   |
| AT4G23200.1 | TYFIPNSTYDTNRRVILSLLPSNVTSHFHFFNGSIGQAPNRVYAVGMCLPGTEEESCIGCLLSASNTLLETCL<br>TEENALIWIANRTICMIRYSN     |
| AT4G23210.1 | CIENRKYFTPNGTYDSNRRILSSLPNNTASRDGFYYSIGEEQDRVYALGMCIPKSTPSDCSNCIKGAAG<br>WLIQDCVNQTDAYYWALDPTLCLVRYSN  |
| AT4G23260.1 | CDNTTGTFFIPNSPYDKNRRILSTLASNVTAQEGYFISIGIAPDQVFATGMCAPGSERDVCSLCIRSTSESL<br>LQSCLDQADAFFWSGEETLCLVRYAN |
| AT4G23270.1 | CSVTTTSSNSTYSTNLKLLSSLSLNASSYSTGFQATAGQAPDRVTGLFLCRVDVSSEVCRSCVTFAVN<br>ETLTRCPKDKGCVFYEQCLLRYSN       |
| AT4G23280.1 | CSITTYSSNSTYSTNLKLLSSLSRNASYSTGFQATAGQAPDMVTGLFLCRGNVSSEVCRSCIALSVNE<br>SLSRCPNEREAVFYEQCMLRYSN        |

|                  |                                                                                                           |
|------------------|-----------------------------------------------------------------------------------------------------------|
| AT4G23300.1      | C IENRKYFTPNGTYDSNRRLILSSLPNNTASQDGFYYSIGEEQDRVYALGMCIPRSTPSCDFNCIKGAAG<br>WLIQDCVNQTDAYYWALDPTLCLVRYSN   |
| AT4G28670.1      | CNNGTVSNEEAYRRSYQINLDAIRGDMRHVKFGTHEHGDPPERMYVLSQCVDLSSDECSLCWSRATD<br>LLSQCFPATGGWFHLDGCFVRADNY          |
| AT4G38830.1      | CSNVTGNFTVNTPYAVNLDRLISSLSLRRNVNGFYNISVGDSDSEKVNISISQCRGDVKLEVCINCIAMAGK<br>RLVTLCPVQKEAIIWYDKCTFRYSN     |
| AT5G37660.1      | CSQQKFPASAYESNLNLLTSLVNSATYSSYNFTIMGSSSDTARGLFQCRGDLSPDCATCVARAVS<br>QVGPLCPFTCGGALQLAGCYIKYDN            |
| AT5G40380.1      | TFVEDMHLSLKLTRRFATESLNSTTSIYALIQCHDDLSPSDCQLCYAIARTRIPRCLPSSSARIFLDGCFLR<br>YETY                          |
| AT5G41290.1      | CMKSSRNNTSNTTYNKNLNTLLSTLSNQSSFANYNLTGLASDTVHGMFLCTGDVNRITTCNACVKNAT<br>IEIAKNCTNHREAIINYDCMVRYSN         |
| AT5G41300.1      | CIDSSRNNTGNTTYNKNLNTMLSTFRNQSSIVNNYNTGLASDTVYGMFLCTGDVNITTCNNCVKNATI<br>EIVKNCTNHREAIINYDCMVRYSN          |
| AT5G43980.1      | CANQKSPDPTGVFSQNLKLFSLVSQSSQSFASVTSQDNTTAVIGVFQCRGDLQNAQCYDCVSKIPK<br>LVSKLCGGRRDDGNVVAARVHLAGCYIRYES     |
| AT5G48540.1      | CNTNSNISASSQVSKNIDSLLATLVSKTPSKGFKTTTSSSYNNKEKVYGLAQCRGDISNTDCSTCIQDAAKK<br>IREVCQNQSDSRILYDFCFLRYSQ      |
| EFJ11427         | AQMGRNLLTVLATLQDQGAAGGYKSTSFSGMSDVTYGFQCRGDISAQECSSCARSAVQILNSTCVRN<br>STKGGRIHPGNCFLRYED                 |
| EFJ16458         | CGEEKFTNGSSYSTALDNLLATLITNAPVTGFFQSSVQSAELTYGLLQCRQDMSRSDCDQCARDIGQAV<br>KSRCSSSLGAKIQLYGCFLYEN           |
| EFJ17937         | CGEEKFTNGSSYSTALDNLLATLITNAPVTGFFQSSVQSAELTYGLLQCRQDMSRSDCDQCARDIGQAV<br>KSRCSSSLGAKIQLYGCFLYEN           |
| LOC_Os01g23970.1 | CNATAGNHTAVGSAYLSNLRALGGALSRRALATGFASGSYGAAPDEVHGLVLCRGDFTGGNCTDGLAS<br>AFRDAQAQFCPGAADATVYYDQYMIRYTN     |
| LOC_Os01g26390.1 | CQDSRGKYTSNSTYQANIQLSSTLPKAAAPSTGLFATRIVAGNAPDTVYALAFRCRGDITNASACAGCVA<br>SGFQDAQQLCPFNKAASLYDLCLLRFAD    |
| LOC_Os01g36790.1 | MDDLNSNVSANGFGTSAVGTAGLNPNAVFLGQCYRDLSPVDCKLCFAEVRSLPKCYPASAGGRLYLD<br>GCFGRYANY                          |
| LOC_Os01g38850.1 | CSLSGGKYEPNSTYEANLRALASLLAEARATAFASDSFGAAPDAVYGIACRGDYAGDACAGGLRKAFR<br>DAIDHGVFCAGFRDVTVYDEHMFERS        |
| LOC_Os02g43000.1 | CSPSKYEPNTAFQSNLNLSSIASTASSGAAYNSFTAGGGAGPDAAGTAAAGLYQCRGDLSPGDCVAC<br>VRQTVARLGAVCANAYAASLQVDGCVVRYD     |
| LOC_Os02g50200.1 | CSQGRYASGTQYASDVDSVLTSVANSAPYSPYANFTSPTSNSVVGYYQCRSDLPASVCTGCVRSAISRLSS<br>LCAWATGGAVQLRACFVRYGN          |
| LOC_Os03g16950.1 | AGNSKAVASINSVLTDLVAKGSTGGGFATSSAGKANNVIYGLAQCRGDVSTSDCQACLASAANQILTSC<br>NYQSDSRIWYDYCFMRFEN              |
| LOC_Os03g16960.1 | SKAVASINSVLTDLVTKGSTGVGFATSTAGKGNVVIYGLVQCRGDVSTSDCQACLASAANQILTSCNYQS<br>DSRIWYDYCFMRFEN                 |
| LOC_Os03g36650.1 | CSATDSFAADSSFAGNLGRLVSLLEAKAPAIGFDIATVGVGGDGEDQRVHGLALCRGDVARATCAECIRA<br>AGALARRVCPSKKDAVVWLDACMLRYS     |
| LOC_Os04g09780.1 | CSPQNYTAGSAYGTSRLRGVLKDVVDAAVSGGGYAVANDAGGAAHGLAICYADAPPEVCRLCLAMAAG<br>NLSLACPRAVGGAMLYNNCLLRYA          |
| LOC_Os04g25060.1 | CDTSAGTYKAGSAYESNLRDLAAALRADAAASPSALFATGNRGGAPDAVYGLLLCRGDLVSDCFDCGT<br>RVLADVGRVCGGRHGRAKDVALVYNQCYARFSN |
| LOC_Os04g25650.1 | CDTSAGTYKAGSAYESNLRDLAAALRAGAAASPSALFATGIRGGAPDAVYGLLLCRGDLVSDCFDCGTR<br>VLADVGRVCGGRHGRAKDVALVYNQCYARFSN |

|                  |                                                                                                              |
|------------------|--------------------------------------------------------------------------------------------------------------|
| LOC_Os04g45460.1 | CSPSKYQPGTPFEGNLNLSLLASIANAAPNGGYNSTAGSNGTGDGAAAYGLYQCRGDLGNADCAACVR<br>DAVGQLNEVCAAAYAASLQLEGCVRYDS         |
| LOC_Os04g56430.1 | CGDGTYEQGSAYENLLNLALTLRDGASSQEILFSTGSNGAAPNTVYGLLLCRGDISRAACYDCGTSVWR<br>DAGSACRRAKDVALVYNECYARLSD           |
| LOC_Os05g02200.1 | QASVAQVLSLVPRASAGYYATATAGRGGDGSIAIWGLAQCRGDIPAPDCALCASAAARQLAGACRGR<br>ADARVWYDYCFARYDD                      |
| LOC_Os05g03920.1 | ADQEGFDVSVNTLELIYQNVTRSGFGAAASGEGADTVYGLGQCMGYLSPTDCQLCYAQRSVKLPHCLP<br>ATGGRIYLDGCFLYG                      |
| LOC_Os05g41370.1 | CPTTSSTNSSHVDDGAFGANLRALLSSLSAAAAASSSGFAENATGAAPDTAYGLAQCRGGIVGGGNGTS<br>CRSCLDDSVRDAKACPGEKSAVIISDYCLVRYSN  |
| LOC_Os06g14280.1 | CSQARYDAGTQYAADVDTALSALTNSAGYTAYANYTSPSAASGTGLVGVYQCRSDLPAAICGGCVRSAA<br>TKLASLCNSAAGAGVQLRACFVRYGN          |
| LOC_Os07g30410.1 | CGSSGNYTAGSKYQANLQALAATLPSTASSSSPALFAKDAAGGGDAEPDRVFALTLCRGDTASANASSSS<br>CADCASRAFRDAQSVCPSYKEVAVYYDPCLLYFS |
| LOC_Os07g30510.1 | CGSSGNYTAGSKYQANLQALAATLPSTASSSSPALFAKDAAGGGDAEPDRVFALTLCRGDTASANASSSS<br>CADCASRAFRDAQSVCPSYKEVAVYYDPCLLYFS |
| LOC_Os07g34980.1 | CSNANTITHMEPTYKTNLLQLAKNLITNVNQTLHSANGTAGAAGPDTVYGAVLCRGDSSAESCATRL<br>QRVLDTAS                              |
| LOC_Os07g35004.1 | CNTTAARRTYLPNSTFEANLNGLFAVLSRNASASGYAAGAFGAAPDTAYGLLLCRGDFGTNDCSAARLA<br>SSFQQAASSCLYSKDVAVYYDQYQLRYSQD      |
| LOC_Os07g35140.1 | CNGTRGNFTEGSFGLNLELLAAELPANASSSRSLFASAAVGAAPEDRVFGLALCRGDMRDAACA<br>GCVSGAFQRLRALCGRDRDATYHDLCCVRYNS         |
| LOC_Os07g35280.1 | SGDVFAPRSTYQSNLALLSAGLAKNASASPALFAAGGVGDPPDTVYGLALCRGDTTATACGACVAAAF<br>QDGGQLCAYAREATVFYDPCYLRFNS           |
| LOC_Os07g35290.1 | CGQSGNFSANSAYQSNLRQLSATLPKNASAALFAAGSLGTVPDIVYALALCRGDANASACESCVDNAFQ<br>GGQQLCPYNKDFIVYDLCYLRFTN            |
| LOC_Os07g35300.1 | CGQGGNYSANGTYQSNLAGLSATLPKNASASRTLFAKDSLGAVPDIVYALALCRGDVANATACESCVAT<br>AFQDAQQLCPYDKDAFIVYDLCYLAFSN        |
| LOC_Os07g35310.1 | CGTTGNFTANSTYQANLDAVAAALPRNISSSPDLFATAMVGAVPEQVSALALCRGDANATECSGLATA<br>FQDVQNMCAYDKDAAIYYDPCILYYSN          |
| LOC_Os07g35330.1 | CASGAYAANSTYEANLAVLAAALPGNASTAAAAGYATATVGAVPDQVSALALCRGDANATACRACVA<br>ASFRVARRDCPSSKDATTYQDGCIVRFSD         |
| LOC_Os07g35340.1 | NTYVGNSTFEANLNHLAAELPGNVSTAHTGGFAVATVGADPDQVFALALCRGDVNATACRACVAAAF<br>VDGKNACPGINGVTVYEDACVVRFS             |
| LOC_Os07g35380.1 | CDEGVGNTYVANSTFEANLNVLAAALSPNVSVAPAGFAVATVGADPKVFAMALCRGDVNASACSAC<br>VAAAFVDGKKDCPGNSGVAMYEDACVARFSRY       |
| LOC_Os07g35390.1 | CNDTAGEFPARRSSYLASINLIAATLPGNASAPDLFATAEGVGAPPDQVSALALCRGDANASTCLAHLT<br>QAFLDLPNACAYHKVAAIFYDSCLLAYSN       |
| LOC_Os07g35410.1 | CDMGVATYAANSTFEANLDRLGAELPANVSAARATGGYAVATVGAAPDLVYALALCRGDVNASACGA<br>CVAAAFADGKRSCPGIKGATVSGPGDGCVLRYNS    |
| LOC_Os07g35540.1 | TNVTGNSAFDRNLGLLAAALANASAAGAPGFAVRTAGAAPPDQVYALALCRGDVNASACRACVAAAF<br>VDAKGVCPGGISLYEDAQLRFT                |
| LOC_Os07g35580.1 | CGENGNYTANSTYQANLQLAALHKNVSSGTGGGRLFASGAVGAVPDAVYALALCRGDINASACADC<br>VGTIFQDAQQLCPYRKEVSIVYDSCYLRFSN        |
| LOC_Os07g35640.1 | CNATAGNYTEGSAYQANVRALASALPANASSSRALFAEGAAGTAPDKVYAIALCRGDTNASSCAACLA<br>AFDTAQQQLCAFNRRTLFNDPCILRYSQD        |

|                  |                                                                                                           |
|------------------|-----------------------------------------------------------------------------------------------------------|
| LOC_Os07g35650.1 | CDPYSASGRYSENSTFQANVNRLSATLPRNTSSSPAMYATGAAGDVPDKVYGYALCRGDVADAHACER<br>CVAAALRDAPRVCPLVKDALVFHDLCLQLRYSN |
| LOC_Os07g35660.1 | CDTAGGNYTEGSTYQANVRALASALPVNASSSRALFAKGAAGAAPDVVYAIALCRGDTNASSCAACVAT<br>AFQDAQQLCAFNRRTMFDDPCILRYSQ      |
| LOC_Os07g35690.1 | GNYSKNGTYQVNLDLLSTLTPKNTSSSPAMYATGTVGDVDPDKVYGLALCRGDANASACERCVAAALRD<br>APRRCPVKDVLVFDLCLQLRYSN          |
| LOC_Os07g35700.1 | CGDSGNYTEHGTYHANIQLATSLPSYASSPSLAFASGSSGTVPAIYALALCRGDTNSSSCATCVAAAIQS<br>AQELCPLVKTIVYDDTCILRFAN         |
| LOC_Os07g35740.1 | GTYTANSTYDTNLQSLIAALQONASTSPTLFAAGALGAAPDAVYGLILCRGDVSSSDCYDCGTRAGQDV<br>APACNRTRDAILVYNQCYTRFS           |
| LOC_Os07g35750.1 | CGTGGTYAANSTYETNLLDLISALQGNASSSPTLYASGAVGSGGRDAVYGVMLCRGDLSTSDCNDGTR<br>AGQDVGRVCNRTRDAALVYNQCYVRVSD      |
| LOC_Os07g35790.1 | CGTSGGNYTAGSTYESNLLRLASTLRANASASPTLAFASGVRGAGPDAVYGLLLCRGDMNPSCDFDCGTR<br>VGDDVAQACNRTKDAILVYNQCYAQFSD    |
| LOC_Os07g35810.1 | CGTSGGNYTAGSTYESNLLRLASTLRANASASPTLAFASGVRGVGPDAVYGLLLCRGDMNPSCDFDCGTN<br>VWRDAGPTCNRTKDAILVYNQCYAQFSD    |
| LOC_Os07g43560.1 | CNGSSNYTANSAFQRNLGVLAAALPGNASTSPDLLANATVGGAPDTVYALAFCPPIDNQNASGCRACV<br>ASAFADARSLCPNNRGAHIIYDGCVLTF5     |
| LOC_Os07g43570.1 | CSGRRYAANSSFDASLQQVARTLPGNASSPFLFATLAVAGEAYALALCQGGTSAGSCNYCVAQTMRD<br>GEHACAGDADVAMYDDICTVRFSD           |
| LOC_Os07g47230.1 | CPSTADGTYAPNSTYQSNLAALAEELIENSTEYGAAGSFGAAPDAVYGVALCRGDSKGPLCAGYLREAF<br>DAAMNRTSSRPLCELRRNVTLFYDRFQLRFA  |
| LOC_Os08g04210.1 | INFVSDLVAKARTGGGFATSKAGRGYDAFYGLAQCRGDVSGGDCACLAQAAKQMVSYCNYSDSRL<br>WYEYCFMRYDNY                         |
| LOC_Os08g04230.1 | RSINSVSDLAAKARAGGFATSSAGRGIDAFYGLAQCRGDVSGGDCACLAQAAKQMVTCNNTLDS<br>RIWYEYCFMRY                           |
| LOC_Os08g04240.1 | RSVNFVSDLVAKARTGGGFATSRAGRGYDAFYGLAQCRGDVSGGDCACLAQAAKQIVSNCNYSDS<br>RIWYEYCFMRYNY                        |
| LOC_Os08g04250.1 | RAVNFVSDLVAKARTGGGFATSKAGRGSEVFYGLAQCRGDVSGGDCACLAQAAKQMVSNCNYS<br>DSRIWYEYCFMRY                          |
| LOC_Os10g04720.1 | CGNGGNYTANGTYQSNLARLAAALPSNASSSPDHFATATAGQAPDAAYALALCRGDVANATACGDCV<br>AASFQDARRTCPDKSATIYYDDCLLRF        |
| LOC_Os10g04730.1 | GVFCDNLKFVSATLPNKTSPPHYATAAAGQAPDVVYVVALCRGDLNDTACGESVAYTFARLINESCVA<br>NYTAGAYYGDCTGVYS                  |
| LOC_Os10g17950.1 | CNNGSAYAANTTYDTNVHSILATLTARTPNTTGFATATTGRGTDTEAWGLALCRGDTDRVGCASCLAA<br>VPAVAFNECRGDMDVTFYDRCLARFS        |
| LOC_Os10g17960.1 | CNNGSSYAANTTYHSNVRAVLTALSAITPNSTARFATASAGRGADAVWGLALCRGDTDRAGCASCLA<br>AVPAVAFGECRDRDVAVFYDRCLARFS        |
| LOC_Os11g28104.1 | CSQYNATPAAAFALANATFAVLRANLSSAGGGGFATAAEPRAAAPAFAMAQCRPYVAGAGSCAAC<br>FDAAASRLRARGAANGGRAILDGCVVRYES       |
| LOC_Os11g38850.1 | CGATNYTARSAYESNLERLIAGLAKNASTPSLFGKAAGAAPDTVYGVALCRGDLPNASACGDCVAGAS<br>RVARRACPLAEDVVVADDAGCQLRFS        |
| LOC_Os11g45540.1 | CGSSKYTANSIYQSNLDSLLSSFLVVSVDSSSALFAKGSRGAAPDTVYAVALCRGDANASACSGCVDA<br>AYAAATARLCLPSKDAAVFYDECALRFSD     |
| LOC_Os12g41270.1 | CSSWNNFVSGSYQVNLFKLLGNLAAGGAAAGSGGFYSYSGALSMDMFGVAMCYVDRHWTKCRRRC<br>LDAATSGAAAFCPYSRRVDVVMYDECVLRYSD     |
| LOC_Os12g41410.1 | CSTTGNYSGDSQYKKNLDQLLSTLATAATDDGWFNNTSSVGTGGDDQVFLIMCYADRNPTQCKECLAG<br>APAGITQVCPGSRTVNANYDACLLRYSD      |

|                  |                                                                                                    |
|------------------|----------------------------------------------------------------------------------------------------|
| LOC_Os12g41490.1 | CSTAGNYTGDSQYKKNLDQLFTTSLAGAIAGDWFNTSSVGTGADQVFLGIMCYADRNSTQCQECLAGA<br>PAGIVQVCPGSRADANYDACLLRYS  |
| LOC_Os12g41530.1 | CSTTGNYTGDSQYKKNLDQLFTSLSGGAIAGDWFNTSSVGTGADQVFLGIMCYADSNATECQKCLAMA<br>PAVVQHPCRGSRSVNANYDACLLRYS |
| SiCBMIP          | GAQTQASISQVLAALVPRASAAYATATAGSGSSAIWGLAQCRGDIPASDCALCISAAAKQAASSCRGQ<br>ADVRLWYDYCFRLRYTD          |

## DUF26-B sequences

|              |                                                                                                             |
|--------------|-------------------------------------------------------------------------------------------------------------|
| AFP1_DUF26-B | DNPKAFEKAVGKVMGKATAQASAAAGSAGLGRDKEQYTPFVSIYGLAQCTRD LAPLTC AQC LSTALSRFG<br>DYCGAQQGCQINYSSCRVRYEI         |
| AT1G04520.1  | AGTGFEERRDTAFGVMQNGVVS GHGFYATTYESVYVLGQCEGDVGD TDCSGCVKNALEKAQVECGSS<br>ISGQIYLHKCFIAYS                    |
| AT1G19090.1  | GEFWRFLDEALVNVTLKAVKNGGF GAASVIKTEAVYALAQCWQTL DENTCRECLVNARSSLRACDGHE<br>ARAFFTG CYLKYST                   |
| AT1G61750.1  | FINTVEYRMDRLIQEAYSSSYFAEETYHVSYLGEVYDLNGLVQCTPD LNQYDCYRCLKSAYNETKDCCYG<br>KRFALVYSSNCMLTYK                 |
| AT1G63550.1  | NPTRFNQTLTEKFSELIFNVSSSLVPYFVEDQERV TQSEGSYDLDTMVQCSPDL DIFNCTVCLRVAFFRIS<br>TCCGLPSYAKIFTPKCLLRFQT         |
| AT1G63570.1  | NSNRFNQTLSNKLDQLIPNVSPSTLIPYFVEDQERV TQLEGSYDLVSMIQCSPLDPSNCTICLRFAYATVS<br>TCCGVPSSALIFTPKCILRYR           |
| AT1G63580.1  | YNQTLPGKLELILKAPSSFSPPYFVEDKEHVTQVEGSYDLEAMAQCSPDL DPSSCTVCLGLVVEKFSE<br>CCSQSRWARIHF PKCLLRYD              |
| AT1G63590.1  | FSQTLLEKLDALILRASLSSLPVPYFVDDQQHVTQLEGSYDLHAMVQCSPDL DPNCTVCLRLAVQRLS<br>GCCSHAQFARIFYTKCLITYE              |
| AT1G63600.1  | PNLDRFPQTLSDKMDELIINATSSPSLSTPYFVEDQERV KQFEGSFDIDSMAQCSPDL DPNCTTCLKLA<br>VQEMLECCNQSRWAQIFTPKCLLRYEA      |
| AT1G70520.1  | CGNTRNKNTFGDAVRQGLRNAVTEASGTGGYARASAKAGESESESAFVLANCWRTLSPD SCKQCLEN<br>ASASVVKGLPWSEGRALHTGCF LRYSDQ       |
| AT1G70530.1  | NRTVFRDNAAELVKNMSVEAVRNGGFYAGFVDRHNVTVHGLAQCWETLNRSGC VECLSKASVRIGSC<br>LVNEEGRVLSAGCYMRFST                 |
| AT1G70690.1  | RTGGNGNVQGV AQCSGDLSTSQCQDCLSDAIGRLKSDCGMAQGGYVYLSKCYARFS                                                   |
| AT2G01660.1  | YRVGVS GELQGVAQCTGDL SATECQDCLME AIGRLRTDCGGAAWGDVYLAKCYARYSA                                               |
| AT2G31620.1  | NKCLFNKNTKALLDKLKEAIRKEQEPYTRDYMYAAGEESL GTTKLYGMMQCTQDLSVKNCVCLDSIIA<br>KLPRCCNGKQGGRV LNPSCTFRYELY        |
| AT2G33330.1  | NVAGTGFEQRRDTAFGVMQNGV VQGHGFYATTYESVYVLGQCEGDIGSDSCSGCIKNALQRAQVEC<br>GSSISGQIYLHKCFVGYSF                  |
| AT3G21960.1  | DKKSFYKNMKAF LHLKAKASSKENKPYVKDYMYAAGRESLGT VKLYAMVQCTQDLSLKNCTVCLDWI<br>MTKLPECCNGKQGGRV LSPSCNF           |
| AT3G21970.1  | NVTNDPKRFEDKRRDLLHKLML EATKDSKENGAKGLLYAVGEMRIGRNKMYAMVQCTQDLWQTGCH<br>VCLEWITQMKYGEFFYRKP GGRVCGRSCSFRYELY |
| AT3G21980.1  | NDKELFNKETSALLEELTNKATDKNNMIGNKFVLYAAGDKRIGTKNVYAMVQCTKDLVTTTSAACFEWI<br>FKMFSKCEGKQGGRV LGTSCNFRYELY       |
| AT3G21990.1  | KNMSDREL FNKETSALLEKLANKASDRNNLDGKQLVLYAAGEKRIGTKKVSAMVQCTKDLIFTKCFECLE<br>GILRKFP ECCDGKQGGRV LGTSCNFRYELY |
| AT3G22040.1  | GDTKMFSKKTNDFLQQLIVKADKPDMDGVELLYYAAGEMRIGREKLHAMVQCAKDLADCKSCLEWSF<br>KELSKCCDGKRGARFLGTSCNLRYELY          |



|             |                                                                                                         |
|-------------|---------------------------------------------------------------------------------------------------------|
| AT3G22060.1 | NVSDPSTFNSQTKALLTELTKKATTRDNQKLFATGEKNIGKNKLYGLVQCTRDLKSITCKACLNGIIGELPN<br>CCDGKEGGRVVGSCNFRYEI        |
| AT3G29040.1 | KNVSSNAEQFKNKRKDLFHKLLGATKDVSDSNDAYAVGETRIGRNKMYAMMQCALDLTTNGCYVCLE<br>WIIIGRYDSFYFDRRQGTRVLSRSCSLRYELY |
| AT3G45860.1 | NQNQVDEFRLVSSSTLNLAAVEAANSSKKFYTRKVVITPQPLYLLVQCTPDLTRQDCLRCLQKSIKMSLYR<br>IGGRFFYPSCNSRYENY            |
| AT3G60720.1 | CSSKSVENDYDFFKRRDDVLSDESTQLGYKVSRSGLVEGYAQCVDLSPSDCTACLAESVGLKLNLCGS<br>AVAAEVYLAQCYARY                 |
| AT4G00970.1 | DRNEFIRLQSELLNRLRSMAASGGSKRKYAQGTDPGSPPYTTFFGAVQCTPDLSEKDCNDCLSYGFSNAT<br>KGRVGIRWFPCSCNFQIE            |
| AT4G04490.1 | QEFAARANRTVEVASTADESSVLKYYGVSSAEFTDTPEVNMLMQCTPDLSDDCNHCLRENVRYNQEHE<br>NWDVGGTVARPCYFRWDDY             |
| AT4G04500.1 | NMAMFSQEWIAMVNRTLEAASTAENSSVLKYYSATRTEFTQISDVYALMQCVPDLSPGNCKRCLRECV<br>NDFQKQFWGRQGGVSRPCYFRWDL        |
| AT4G04510.1 | TLFRQEWEMVDRTLEAVTIDNSTTVLKYYGALKSEFSEFPNVMMMQCTPDINSACKRCLQASVTY<br>FRDQNWGRQGGGICRPSVFRWEF            |
| AT4G04540.1 | KNMTLFEQEWNAMANRTVESATEAETSSVLKYSAEKAETEFPNVYMLMQCTPDITSQDCKTCLGEC<br>VTLFKEQVWGRQGGVYRPSCFRWDL         |
| AT4G04570.1 | TLFKQQWEEMVNRTLEAATKAEGSSVLKYYKAEKAGFTEFPDVYMLMQCTPDLSRDCKQCLGDCVM<br>YFRKDYMGKGGMASLPSCYFRWDL          |
| AT4G05200.1 | NITENQVSRFNESLPALLIDVAVKAALSSRFATEKANFTVFQTIYSLVQCTPDLTNQDCESLRQVINYL<br>RCCDRSVGGRVIAPSCSFRYELY        |
| AT4G11460.1 | NLTDFDRLWERLIAHMVTKASSASIKYLSFNSRFYAADETNLNSQMVMYALMQCTPDVSPSNCNTCLK<br>QSVDDYVGCCHGKQGGYVYRPSCIFRWDL   |
| AT4G11470.1 | AYTRTWDAFMNMFTRVGGQTRYLADISPRINQEPLSPDLIYALMQCIPGISEDCECTCLGKCVDDYQSCC<br>NGFIGGVVNKPVCYFRWD            |
| AT4G11480.1 | AYTRTWEFMNSMITRVRTRYLADISPRIGSARIYALMQCIRGISSMECETCIRDNVRMVYQSCCNGFIG<br>GTIRKPVCFRWD                   |
| AT4G11490.1 | IWEALTDRLMSDASSDYNASLSSRRYYAANVTNLTFQNIYALMLCTPDLEKGACHNCLEKAVSEYGNL<br>RMQRGIVAWPSCCFRWDL              |
| AT4G11521.1 | FDRIWDELMSRTITTASRTHGSLSGHKYAAADVSLTTFQTIYTMVQCTPDVSSGDCEFLKRTVLDYKK<br>CCRGHIGGAFVRPFVCFRWDL           |
| AT4G11530.1 | TVFDRIWEELMLRTITAASLSSNGSSFGQKYFAAEVASLTFQTMVYAMMQCTPDVSSKDCFLKTSV<br>GDYESCRCRGKQGGAVIRPSCVFRWDL       |
| AT4G20550.1 | NNMSDRGLFNKETSALLEKLAYKASDRNLDGKQLVLYAAGEKRIGTKKVYAMVQCTKDILFTKCFECLE<br>GILRKFPQCCDGKRGGRVFGTSCNFR     |
| AT4G20560.1 | NNMSDRGLFNKETSALLEKLAYKASDRNLDGKQLVLYAAGEKRIGTKKVYAMVQCTKDILFTKCFECLE<br>GILRKFPQCCDGKRGGRVFGTSCNFR     |
| AT4G20570.1 | NNMSDRGLFNKETSALLEKLAYKASDRNLDGKQLVLYAAGEKRIGTKKVYAMVQCTKDILFTKCFECLE<br>GILRKFPQCCDGKRGGRVFGTSCNFR     |
| AT4G20580.1 | NNMSDRGLFNKETSALLEKLAYKASDRNLDGKQLVLYAAGEKRIGTKKVYAMVQCTKDILFTKCFECLE<br>GILRKFPQCCDGKRGGRVFGTSCNFR     |
| AT4G20590.1 | NNMSDRGLFNKETSALLEKLAYKASDRNLDGKQLVLYAAGEKRIGTKKVYAMVQCTKDILFTKCFECLE<br>GILRKFPQCCDGKRGGRVFGTSCNFR     |
| AT4G20600.1 | NNMSDRGLFNKETSALLEKLAYKASDRNLDGKQLVLYAAGEKRIGTKKVYAMVQCTKDILFTKCFECLE<br>GILRKFPQCCDGKRGGRVFGTSCNFR     |
| AT4G20610.1 | NNMSDRGLFNKETSALLEKLAYKASDRNLDGKQLVLYAAGEKRIGTKKVYAMVQCTKDILFTKCFECLE<br>GILRKFPQCCDGKRGGRVFGTSCNFR     |
| AT4G20620.1 | NNMSDRGLFNKETSALLEKLAYKASDRNLDGKQLVLYAAGEKRIGTKKVYAMVQCTKDILFTKCFECLE<br>GILRKFPQCCDGKRGGRVFGTSCNFR     |
| AT4G20640.1 | NNMSDRGLFNKETSALLEKLAYKASDRNLDGKQLVLYAAGEKRIGTKKVYAMVQCTKDILFTKCFECLE<br>GILRKFPQCCDGKRGGRVFGTSCNFR     |

|             |                                                                                                       |
|-------------|-------------------------------------------------------------------------------------------------------|
| AT4G20670.1 | NNMSDRGLFNKETSALLEKLAYKASDRNLDGKQLVLYAAGEKRIGTKKVYAMVQCTKDIFTKCFECL<br>GILRKFQCCDGKRGGRVFGTSCNFR      |
| AT4G21230.1 | SVTDKEGFSKGLGDLDSLAKIDAANETKEVKFAAGVKGTIYALAQCTPDLESDCRICLAQIFAGVPTCC<br>DGKTGGWWTNPSCYFRFEV          |
| AT4G21400.1 | ISANRDEFDRLQIELLDRLKGIAAAGGPNRKYAQGSGSVAGYPQFYGSAHCTPDLSEQDCNDCLVFGF<br>EKIPGCCAGQVGLRWFFPSCSYRFET    |
| AT4G21410.1 | NRDDFERLQRGLLDRLKGIAAAGGPNRKYAQNGSASAGYRRFYGTQCTPDLSEQDCNDCLVGFEN<br>IPSCDAEIGLRWFSPSCNFRFET          |
| AT4G23130.1 | TADQSDRFNDAVLSLMKKSAAEAA NSTSKKFAVKKSD FSSSQSLYASVQCIPDLTSEDVCMCLQQSIKELY<br>FNKVGGRFLVPSCNSRYEV      |
| AT4G23140.1 | KQIDGFTSFVSSTMSEAAGKAANSSRKLTVNTELTAYQNLYGLLQCTPDLTRADCLSLQSSINGMALS<br>RIGARLYWPSTARYELY             |
| AT4G23150.1 | QFTNLVLSNMNQIAIEAADNPRKFSTIKTELTAQTFFYGLVQCTPDLSRQNCMNCLTSSINRMPFSRIGA<br>RQFWPSCNSRYELY              |
| AT4G23170.1 | SQINQFIVLVQSNMNQAAMEAANSSRKFSTIKTELQTLYGLVQCTPDLSQDCLRCLTRSINRMPLS<br>RIGARQFWPSCNSRYELY              |
| AT4G23180.1 | DLLSDLVLP TLNQ AATVALNSSKFGTRKNNFTALQSFYGLVQCTPDLTRQDCSRCLQLVINQIPTDRIGA<br>RIINPSCTSRYEI             |
| AT4G23190.1 | TEFTKIWEGLMGRMISAASTAKSTPSSSDNHYSADSAVLTPLLNIYALMQCTPDLSGGDCENCLRQSAID<br>YQSCCSQKRGGVVMPSCFLRWDL     |
| AT4G23200.1 | YKTNETEFNTVWSRLTQRMVQEASSTDATWSGAKYYTADVAALPDSQTLYAMMQCTPDLSPAECNL<br>CLTESVVNYQSCCLGRQGSIVRLSACFRAEL |
| AT4G23210.1 | LTEFTKIWEDLTSRTITAASAARSTPSSSDNHRYVDFANLTKFQNIYALMQCTPDISSDECNNCLQRGVLE<br>YQSCCGNNTGGYVMRPICFRWFQ    |
| AT4G23260.1 | NTNQTVFDIEWNNLTSSMIAGITSSSSGGNNSKYSDIALVPDFKNISALMQCTPDVSSDECNTCLRQ<br>NVVDYDNCCRGHQGGVMSRPNCFRWEV    |
| AT4G23270.1 | IDLNASQSLYGMVRCTPDLREQDCLDCLKIGINQVTDYDKIGGRILLPSCASRYDNY                                             |
| AT4G23280.1 | KRFAVTKFDLNLQSLYGMVQCTPDLTEQDCLDCLQQSINQVTDYDKIGGRIFLPSCTSRDYDNY                                      |
| AT4G23300.1 | TDFKNIWEDLTSRTITAASAARSTPSSSDNHRYVDFANLTKFQNIYALMQCTPDISSDECNNCLQRGVLE<br>YQSCCGNNTGGYVMRPICFRWFQ     |
| AT4G28670.1 | KEKSAEFKGLVKEVTKSIVEAAPYSRGSFVAKMGIRDLTVYGLGVCWRTLNDELCKLCLADGALSVTSCLP<br>SKEGFALNAGCYLRSNY          |
| AT4G38830.1 | NFTGDRDSWEKSLRGLLEGLKNRASVIGRSKKNFVGETSGPSFQTLFGLVQCTPDISEEDCSYCLSQGIA<br>KIPSCCDMKMGSYVMSPSCMLAY     |
| AT5G37660.1 | YFRAGGSGDVQGMGQCVGDLTVSECQDCLGTAIGRLKNDCGTAVFGDMFLAKCYARYST                                           |
| AT5G40380.1 | FGVAGENGVHALAQCWESLGKEDCRVCLEKAVKEVKRCVSRREGRAMNTGCYLYSD                                              |
| AT5G41290.1 | LESIVQCTPDLDPRNCTCLKLALQELTECCGNQVWAFIYTPNCMVSFDTY                                                    |
| AT5G41300.1 | SYDLDSLQVQSPHLNPENCTICLEYALQEIIDCCSKFVAMIFTPNCFVNY                                                    |
| AT5G43980.1 | QYESVYVLGQCEGLNSDCGECVKDGFKAKEGSESGVYVYQKCFVSYSY                                                      |
| AT5G48540.1 | PKKFDNELGALFDKIRSEAVLPKNKGLGKGTCLTPFVTLNGLVQCTRDLSLDCAQCFATAVGSFMTTC<br>HNKKGCRVLYSSCYVRYEF           |
| EFJ11427    | LAIFQNSRTALEFLKAKVPRNARKFVA AVAGIGSAVPAYALGQCIPDLASAADCASCLAAENAIASTCRG<br>GGGGVCYSSCTLFFQ            |
| EFJ16458    | IASSPGYDDNLKSALATLSRRGSSFTATVSGSGSQVFLGECRGLDSSQQCDSCVRVAMRNMTDRICGN<br>TSGSILLNSCYTRF                |

|                  |                                                                                                                   |
|------------------|-------------------------------------------------------------------------------------------------------------------|
| EFJ17937         | IASSPGYDDNLKSALATLSRRGSSFTATVSGSGKSQVFLGECRGLDSSQQCDSCVRVAMRNMTDRICIGN<br>TSGSILLNSCYTRF                          |
| LOC_Os01g23970.1 | AAARFMAKATELMNRTADLAAFSSSSPSRYATGETWFDEQGVSVVYGLVQCTPDLTGEQCRSCLAGII<br>AQMPKLFGDASSRPVGGRIILGVRNRLRYEK           |
| LOC_Os01g26390.1 | LLLFTLLNATAESAASSRRFTTSRLDVSSLPTLYCLMQCTPDLTAGECAACFEDFPRLTLQYLDGARGGRI<br>LATRCTMRYEI                            |
| LOC_Os01g36790.1 | NYTGANPRGFADAVRAALANVTGVAASAAPVGGGDGYAVGSASAGGATAFALAQCWGSNLNATACG<br>QCLRAAAAAAARCAPAAAEGRALYTGCYLRYST           |
| LOC_Os01g38850.1 | FGDRVMELINTTAEFAAWNSSKRGYATGEAGFGELDVGATRLGLVEQQCRSSPDLVIFALVQCTPDLSP<br>AGCLSCLSGIASQMPRWFTGAADYRLGGRILGVRNRLRYE |
| LOC_Os02g43000.1 | CSSSTRDGAFLSSRDGVLGELQAAAGYKLTSGTVQGVAQCLGDVPANDCTACLAEEAVGQLKGCAGT<br>ALAADVLAQCYVRY                             |
| LOC_Os02g50200.1 | GSGGVQAMSQCVDLGAACSDCVSAAAGQLKAGCGYATAGEVYLGKCYARF                                                                |
| LOC_Os03g16950.1 | DNGKAFQKAVGKVMGKATSQASQAGSGGLGRTKDQYTPFINIYGLAQCTQDLSPLACAQCLSTAVSRF<br>GQYCGAQQGCQINYSSCRVRYEI                   |
| LOC_Os03g16960.1 | DNAKAFQKAVGKVMKATAQVSQAGSGGLGRVKDQYTPFINIYGFAQCTRDLSPITCAQCLSTAVSRF<br>DQYCGAQQGCRILYSSCMVRYEI                    |
| LOC_Os03g36650.1 | REVSRLMKRLTRTAYLSPLLFAAGEAVAVGGAQRLHGMAQCTKDLSGGDKMCLSAIDQLLARGCAK<br>EGGKVLGGSCSLRYDF                            |
| LOC_Os04g09780.1 | GDAAQFGAALSRLMDRLALAAASSSSSRGRRFAFGQTNITGDGGDSLYAFVQCVDLSPDDCRRCLQ<br>SIAASLPMTRGGRAVSLTCYTRFE                    |
| LOC_Os04g25060.1 | AAYDRAVTELLAATVRYAVEENPARLFATGQVRVGGDARDPGRNIYSMAQCSPDLPPASCRRCLDGLV<br>ARWWQVFLNNEGARVAGARCYLRSE                 |
| LOC_Os04g25650.1 | AAYDRAVTELLAATVRYAVEENPARLFATGQVRVGGDARDPGRNIYSMAQCSPDLPPASCRRCLDGLV<br>ARWWQVFLNNEGARVAGARCYLRSE                 |
| LOC_Os04g45460.1 | CSTSTSGDGFKNRDAVLAALQGGLANGYKVSSSGNVQGVQSCLGDLAAGDCTTCLAQAVGQLKGT<br>CGTSLAADVLAQCYVRY                            |
| LOC_Os04g56430.1 | ADVAAYDRAVTRLLAATAEYAAGDIARKLFATGQVRVGGDARDPGRNLYATAQCAFDTLEACRGCLEGLVA<br>RWWDTFPANVDGARIAGPRCLLRE               |
| LOC_Os05g02200.1 | QNATDPEAFEKAQRKVMARVAADAGDAGGGGLARETARFKDGVTIYGLGWCTRDIITAADCGLCVAQ<br>AVAEMPNYCRFRRGCRVLYSSCMARYETY              |
| LOC_Os05g03920.1 | CSNATVSSPASFAATSALLRNVTAAAPGARDYYYYYASSSSASALPSVSPRVYAAAQCWRSLNATACA<br>ACVATARDRVVGRCLPRAAEGYGLNAGCVVRYSTQ       |
| LOC_Os05g41370.1 | DNATQPERFKSLLGTLMGNLTDAAARASSPLMFAAGETDLPPFTKIYGMAQCTRDLAAGDCYRCLVGA<br>VNNIPKCCDGKQGGQVITRSCSIRFEV               |
| LOC_Os06g14280.1 | GAAGYVQAMSQCVDLGAACSDCVSAAAGQLKAGCGYASAGEVYLGKCYARF                                                               |
| LOC_Os07g30410.1 | YTTVRMDVVTPLFSLMQCTPDMSSGDCRQCLQDLVGNTTFNGSVSGVRNIGARCGRYDYTY                                                     |
| LOC_Os07g30510.1 | YTTVRMDVVTPLFSLMQCTPDMSSGDCRQCLQDLVGNTTFNGSVSGVRNIGARCGRYDYTY                                                     |
| LOC_Os07g34980.1 | RAQFSQLFSELMEKIAAAVSRPVNYLTGRGWFDLKSQTVYALAQCTDGMPPENCRCSDGIIDEGKK<br>MVGGGTLGGAVLGMRCSLWYQT                      |
| LOC_Os07g35004.1 | VAAFDAALVAELVNAVADRASNATRRYAAGKAGFAPEAMTVYIAIQCTPDLSPQCRGCLAGIIDQMPK<br>WFSGRVGGRIILGVRCDFRYEK                    |
| LOC_Os07g35140.1 | TTRSFFLSLVGTLFGEMAMYGSYNSSARRYASAVMYVNPQLPTVYGLAQCTPDLSPAQCWHCFQGLQE<br>QNRQWYDGRQGGRIILGVRNCFRYEY                |
| LOC_Os07g35280.1 | APAEVFDAAVVALLNATADHAAASSPRRFATGVEAFRGWGVDRDIYALVQCTPDMSPAGCRSCLAGIIS<br>WVNDPDYFSGSPTGRVLGVRNRYWYD               |

|                  |                                                                                                         |
|------------------|---------------------------------------------------------------------------------------------------------|
| LOC_Os07g35290.1 | NASATAEVFDAAAATLLNATSGYAAANSSRRFATGEEAFDAADPTIYGLSQCTPDMSPDDCRSCLGGIIA<br>LIPQYFGRKRGRARVIGTRCNRYREV    |
| LOC_Os07g35300.1 | NASAPAEVFDAAVATLLNATSSYAAENSSRRFATGEEAFDAAAATPTIYGLSQCTPDMSPDDCRSCLGRII<br>ALIPRYLSRRKGGRAIGMRCNFRYE    |
| LOC_Os07g35310.1 | SDPGRFNGMVAALVNATADYAAHNSTRRYASGEAVLDRESEFPKVYSWAQCTPDLTPAQCGDCLAII<br>AKLPRLFTNRIGGRVLGVRCSYRYE        |
| LOC_Os07g35330.1 | FNAAVVALMNATVDTAVAAGSGSNNTKKYFATAVEDFDPKHYPKIYGMAQCAPVMTAAQCRSCLGG<br>FVSSIPWFLNGKPGGRVLGIWCNLRYE       |
| LOC_Os07g35340.1 | VGWFNAAIKILAALVDHAVATATGNNSTTKKYFATGEEDFDPNYGFACQVDPDLTQEQCCECLNTFLF<br>QAKQVYFGKSLSWVGMNSVWCRLMYS      |
| LOC_Os07g35380.1 | FNAAVTKILAAMVDHAVTSTTGNSTTKKYFVTGEEFDPNIYGFACQVDPDLTPAQCNCLDKLLFYAKQ<br>AYLGKSLSWVRVNSVWCRLMYS          |
| LOC_Os07g35390.1 | ATTEQARFNRLVAALVNATADYAAARNSTRRRYASGEADFNAEFPKVYSWAQCTPDLTPASCRSCLAQII<br>GTIYIGFFENRVGGFVRAVWCSEFQYST  |
| LOC_Os07g35410.1 | WFNAAVAKILAALVEHTWATTTSNATAKKYFSTGEEFNPKIYGFVQVDPDLSPEQCCECVRTLHDQAKI<br>HYMGNSLPWASTYSVWCRLMYS         |
| LOC_Os07g35540.1 | WFNAAVAKILAALVEHAWATTTTTTGNSTTTIKYFATGEEFNPKIYGFACQVDPDLTPEQCCECLRSLH<br>DNAKTVYMGNSLRVWGIYSVWCRLMYS    |
| LOC_Os07g35580.1 | GRYDRAVTGLLNATARYAAGNTNASSRLFATGVMVGFDAQFPKIYAMAQCSPDLSPAQCGLCLGAMV<br>ARWWQTFEPNTQGARSVGARCNMRVEL      |
| LOC_Os07g35640.1 | DYASAVYDAFSGMLVNATADYAAKDSVRRFGTGEMGFNVFDSPHYNIFSLAQCTPDMSEADCRSCLG<br>DIIRMMMPKYFVGKPGGRVFGVRCNFRFEAY  |
| LOC_Os07g35650.1 | AAFDAAVAMLANATAEYAAAANTSRRYGTAEEEGVDGDGDSGRPRMYALAQCTPDKAADVCRACLT<br>TLTTVQLPKLYSGGRTGGGVFGVWCNLRYE    |
| LOC_Os07g35660.1 | AAAFDAASGRLVNATAGYAAADPVRRFGTGEVGFDDATYPRIFSLAQCTPDSEADCRSCLGRIIRWVP<br>QYFAGKPGGRVFGVRCNFRFESY         |
| LOC_Os07g35690.1 | AAAFDAAVAVLVNATADYAAADSSRRYGTGEEGVDGDSDRPKIYALAQCTPDKTPEVCRTCLSTVIG<br>QLPKEFSGRTGGGMFGVWCNFRYE         |
| LOC_Os07g35700.1 | PAFEAAVRLINTADYAATDSVRRFGTGEEAFDETTFPKIYSLAQCTPDMAATACRSCLDIVGRMVSG<br>NLIGRMGGRVLGVRCNLWFEV            |
| LOC_Os07g35740.1 | DVAGYDRAVTELLSATLMYAVVNTTRLFATGQRVQADPGFPNIYSAQAQCTPDLSPALCRSCLDLVARW<br>WKTFRPTTVGARIVGTRCSLRSE        |
| LOC_Os07g35750.1 | ADVRAVDAAVSVLLNATVRYAVENSTRMFATGQRVGSDPGFSDIYSMAQCSPALSRPLCRSCLDGLVG<br>QWWDTFPVNVEGARIAGTRCNLRSE       |
| LOC_Os07g35790.1 | VAGYDRAVTELLNATVRYAVENSTRLFATGQRVGADPGFRNIYSMAQCSPDLSPAQCRSCLDGLVGQW<br>WTGFLFPRNGEGARVAGPRCYLRSE       |
| LOC_Os07g35810.1 | TDVAGYDRAVTELLNATVRYAVENSTKLFATGQRVGNDTGFNSIYSMAQCSPDLSPAQCRSCLDGLVG<br>QWWKTFPLNGKGARVAGPRCYLRSE       |
| LOC_Os07g43560.1 | SDVGEFNGAIYEVLNATADYAAAARRFGTGEISFDPTYPIYISMAWCTPDMAPGRCRACLADTIAQM<br>HAYFNPNAQGARLVGVRCAARYEI         |
| LOC_Os07g43570.1 | AAGRFRYLVEGELLDATADYAVANSTARFATGDVGVGGYFDGEPFSKIYALAQCTPDLTPAQCRACLASA<br>MEEMTRQVFAASSPGGKVIIGERCGLRFE |
| LOC_Os07g47230.1 | AGRFREHVAALLNATARDAAAQPDYGTGDSWFQEGGSMVYALVQCTRDMDPGRGACLQRIISEM<br>PRMLDASQIGGRVLGVRCLLRYE             |
| LOC_Os08g04210.1 | KAFQKAAGKAMGKATAQAVAVGSSGLGRAKEQYTPFVSVYALAQCTRDLSPSCAQCLSAAVSKFDKA<br>CGSGPGCQIDYSSCWARYEI             |
| LOC_Os08g04230.1 | FVNVYALAQCTRDLAPPLCAQCLSTTVSKFAEACGSGQGQCQIDYSSCWVRYEI                                                  |
| LOC_Os08g04240.1 | DNPKAFQKAAGKAMGKATAQAVAVGRSGLGRAKEQYTPFVSVYALAQCTRDLAPPACARCLSEIVSKF<br>DKTCNSAQGCQIDYSSCWARYEI         |
| LOC_Os08g04250.1 | KAFQKVVGKAMVKATTQAVSVGGNGLGRAKEQYTPFVSVYALAQCTRDLAPPACAQCLSSTVSKFDKA<br>CGAAQGCQIDYSSCWARYEI            |

|                  |                                                                                                       |
|------------------|-------------------------------------------------------------------------------------------------------|
| LOC_Os10g04720.1 | ANVRELLTVTARTAAAAARRFATGFMDSSESQTLYSLAQCTPDLAAGDCLACLQRLIAMVNSTTSVR<br>LGGRVLLLRNLFE                  |
| LOC_Os10g04730.1 | QQLLSEVERAAGAAGRFATGVVDTGRTFPLVYSLAQCTPDLASAGDCLACLRLTGMINSTMAVRMGA<br>QHVTRCYFRYEAY                  |
| LOC_Os10g17950.1 | AGHFDALVADLAGALADWAAYNSTLRYAAGVMTSGDGMSTTEDMVHNIYGVVQCTPDQAAAACR<br>ACLEALRVDMPKVFAGKMGGRFNAVWCNLRYET |
| LOC_Os10g17960.1 | AGRFDALVARLAGALADWAAYNSTRRYAAGLMSGDGFTSTTEDMVHNIHGVVQCTPDQAAAACRA<br>CLETLRVDMPKVFAGRIGGRFNAVWCNLRYET |
| LOC_Os11g28104.1 | ADGSFAGAARGLVGDIAAAAPRAGLAAAAARGGVYAAAQCVETVGECCGCAQCLAVPARNIDGCPP<br>DSDGRAVDAGCFMRYSD               |
| LOC_Os11g38850.1 | LVQETARTAAYNSSPPPPATTTYATGRMDVSATFPTLYSMAQCTPDLRPGGCWRCLQSINDMTTRYF<br>AGRRGGRILGLWCNFRYET            |
| LOC_Os11g45540.1 | FTQFFIKTMNYIVAQALSTTKHYAIRVDMDDADASNTVTLPRRLFCLAQCAPDLVEDICYNCLQNFSDL<br>ATANFAGRQGGRILALRCNLRYDT     |
| LOC_Os12g41270.1 | YTDSRGESLTVYGMVQCGRGLLPEECSKCLRHLGELTTGLPNTAGIIRGYSCYSRYD                                             |
| LOC_Os12g41410.1 | ETRWQLMSQLAETAGQTKLRDLTGSTRLGSTSMYGLAQCTRD LAVSECSTCLSDYIVQLSKIFPNNSW<br>AAIKGYSCYLRYD                |
| LOC_Os12g41490.1 | TMNDTRRRRLMSQLAERAGDTKLRDLNGLSPYADSKLGTSAALYGLAQCTRD LAASECRRCLSGYVDDLSN<br>TFPNSGGAIKGYSCYLRYH       |
| LOC_Os12g41530.1 | RWQLMSQLAERAGDTKLRDLNGLSPYVDSKLGTSALYGLAQCTRD LAASECRRCLSGYVNDLSNTFPNN<br>SGGAIKGYSCYLRYQ             |
| SiCBMIP          | NASDPAAFDRERKLMARVAAEAGDAASGGLVRETARFGSATTIYGLGWCTRDITAADCGLCVAQAVA<br>ELPNYCQFRRGCRVLYSSCMARYETY     |
